# Supplementary material for: Surgical Management of Adult Brainstem Gliomas: A Systematic Review and Meta-Analysis
Source: MDPI journal article supplement (doi:10.3390/curroncol30110709), 2023-11-07
Supplement: s1 [file s1]

**Table S1.** Excluded studies.

| Cause for exclusion                             | Author and date of publication |                  |
|-------------------------------------------------|--------------------------------|------------------|
| Combined result without segregation of outcomes | Babu 2013                      | Pollack 1996     |
|                                                 | Faulkner 2021                  | Strauss 2013     |
|                                                 | Kazunari 1999                  | Ueoka 2009       |
|                                                 | Mohme 2018                     | Xu 1997          |
| Case reports                                    | Dono 2020                      |                  |
|                                                 | Ferrolì 2015                   |                  |
| No surgery                                      | Dudoit 2021                    | Reithmeier 2014  |
|                                                 | Kandregula 2022                | Salmaggi 2008    |
|                                                 | Leibtseder 2021                |                  |
| Hazard Ratio not reported                       | Guillamo 2001                  | Rigamonti 2021   |
|                                                 | Hundsberger 2014               | Salvapadian 1999 |
|                                                 | Landolfi 1998                  | Tasic 2016       |
|                                                 | Lapras 1994                    | Theeler 2015     |
|                                                 | Majchrzak 2018                 | Wang 2000        |
|                                                 | Meyronet 2017                  | Waquar 2014      |
| Reviews                                         | Eisele 2016                    |                  |

**Table S2.** Main demographical and clinical characteristics m =months.

| Total Sample. | Mursch et al., 2005 [16] | Liu et al., 2021 [15] | Kesari et al., 2008 [17] | Doyle et al., 2019 [14] | Dey et al., 2014 [13] | Babu et al., 2014 [7] | Article                      |
|---------------|--------------------------|-----------------------|--------------------------|-------------------------|-----------------------|-----------------------|------------------------------|
| 1973-2015     | 1986-1997                | 2006-2015             | 1998-2005                | 1973-2015               | 1973-2008             | 1998-2011             | Sample Date                  |
| 748           | 14                       | 256                   | 101                      | 103                     | 240                   | 34                    | Number of patients           |
| 44.19         | 30                       | NA                    | 36                       | NA                      | 48,7                  | 42,5                  | Age median (m)               |
| 17-79         | 17-66                    | NA                    | 18-79                    | NA                      | NA                    | 18-71                 | Age range (m)                |
| 48.98%        | 11                       | NA                    | 50                       | 59                      | 102                   | 19                    | Gender (M)                   |
| 12.08         | 12                       | NA                    | 4                        | NA                      | NA                    | 2                     | Time before presentation (m) |
| 14.3%         | 2                        | NA                    | NA                       | NA                      | NA                    | NA                    | CN III                       |
| 14.3%         | 2                        | NA                    | NA                       | NA                      | NA                    | NA                    | CN IV                        |
| 35.7%         | 5                        | NA                    | NA                       | NA                      | NA                    | NA                    | CN VI                        |
| 22.1%         | 6                        | NA                    | 22                       | NA                      | NA                    | 5                     | CN V                         |
| 26.8%         | 7                        | NA                    | 25                       | NA                      | NA                    | 8                     | CN VII                       |
| 16.1%         | 4                        | NA                    | 12                       | NA                      | NA                    | 8                     | CN VIII                      |
| 28.7%         | 10                       | NA                    | 23                       | NA                      | NA                    | NA                    | CN IX,X,XI                   |
| 10.9 %        | NA                       | NA                    | 11                       | NA                      | NA                    | NA                    | CN XII                       |
| 38.9%         | 10                       | NA                    | 42                       | NA                      | NA                    | 6                     | Pyramidal Symptoms           |
| 31.1%         | NA                       | NA                    | 40                       | NA                      | NA                    | 2                     | Sensory loss                 |
| 39.6%         | 7                        | NA                    | 38                       | NA                      | NA                    | 14                    | Cerebellar                   |
| 18.8%         | NA                       | NA                    | 19                       | NA                      | NA                    | NA                    | Dysphagia                    |

**Table S3.** Main radiological, anatomopathological and surgical characteristics.

| Total sample | Mursch et al.,<br>2005 [16] | Liu et al.,<br>2021 [15] | Kesari et al.,<br>2008 [17] | Doyle et al.,<br>2019 [14] | Dey et al.,<br>2014 [13] | Babu et al.,<br>2014 [7] | Article          |                         |
|--------------|-----------------------------|--------------------------|-----------------------------|----------------------------|--------------------------|--------------------------|------------------|-------------------------|
| 34.9%        | 4                           | NA                       | 43                          | NA                         | NA                       | 5                        | Mid brain        | Localization            |
| 63.8%        | 12                          | NA                       | 65                          | NA                         | NA                       | 18                       | Pons             |                         |
| 47.0%        | 9                           | NA                       | 52                          | NA                         | NA                       | 9                        | Medulla          |                         |
| 36.2%        | 11                          | NA                       | 31                          | NA                         | NA                       | 12                       | Multi focal      |                         |
| 9.8%         | 1                           | 56                       | 16                          | 0                          | 0                        | 0                        | WHO Grade I      | WHO Classi-<br>fication |
| 23.0%        | 9                           | 148                      | 15                          | 0                          | 0                        | 0                        | WHO Grade II     |                         |
| 20.7%        | 3                           | 20                       | 12                          | 23                         | 75                       | 22                       | WHO Grade III    |                         |
| 36.5%        | 1                           | 32                       | 3                           | 60                         | 165                      | 12                       | WHO Grade IV     |                         |
| 32.8%        | 10                          | 204                      | 31                          | 0                          | 0                        | 0                        | Low Grade        |                         |
| 59.9%        | 4                           | 52                       | 15                          | 103                        | 240                      | 34                       | High Grade       | Treatment               |
| 46.8%        | 12                          | 187                      | 11                          | 88                         | 43                       | 11                       | Resection        |                         |
| 27.9%        | 1                           | 134                      | NA                          | 20                         | 16                       | NA                       | GTR              |                         |
| 25.6%        | 11                          | 53                       | NA                          | 68                         | 27                       | NA                       | STR              |                         |
| 27.9%        | 2                           | 69                       | 45                          | 15                         | 54                       | 23                       | Biopsy           |                         |
| 68.7%        | 6                           | 128                      | 82                          | 64                         | 201                      | 33                       | RT               |                         |
| 30.9%        | 0                           | 52                       | 40                          | NA                         | NA                       | 33                       | Chemo<br>therapy |                         |

|          |                   | Risk of bias domains |    |    |    |    |    |    | Overall    |
|----------|-------------------|----------------------|----|----|----|----|----|----|------------|
|          |                   | D1                   | D2 | D3 | D4 | D5 | D6 | D7 |            |
| Study    | Mursch et al 2005 | +                    | -  | +  | +  | -  | +  | +  | +          |
|          | Kesari et al 2008 | +                    | +  | +  | +  | +  | +  | -  | +          |
|          | Babu et al 2014   | +                    | +  | +  | +  | +  | +  | +  | +          |
|          | Dey et al 2014    | +                    | +  | +  | +  | +  | +  | +  | +          |
|          | Doyle et al 2019  | +                    | +  | +  | +  | -  | +  | +  | +          |
|          | Liu et al 2021    | +                    | -  | +  | +  | +  | +  | +  | +          |
| Domains: |                   |                      |    |    |    |    |    |    | Judgement  |
|          |                   |                      |    |    |    |    |    |    | - Moderate |
|          |                   |                      |    |    |    |    |    |    | + Low      |
|          |                   |                      |    |    |    |    |    |    |            |
|          |                   |                      |    |    |    |    |    |    |            |
|          |                   |                      |    |    |    |    |    |    |            |
|          |                   |                      |    |    |    |    |    |    |            |
|          |                   |                      |    |    |    |    |    |    |            |

**Figure S1.** ROBINS-I tool was applied to evaluate the Risk of Bias (RoB) [7, 13–17]. All the included studies were retrospective single center and were rated “moderate” to “low” risk of bias.

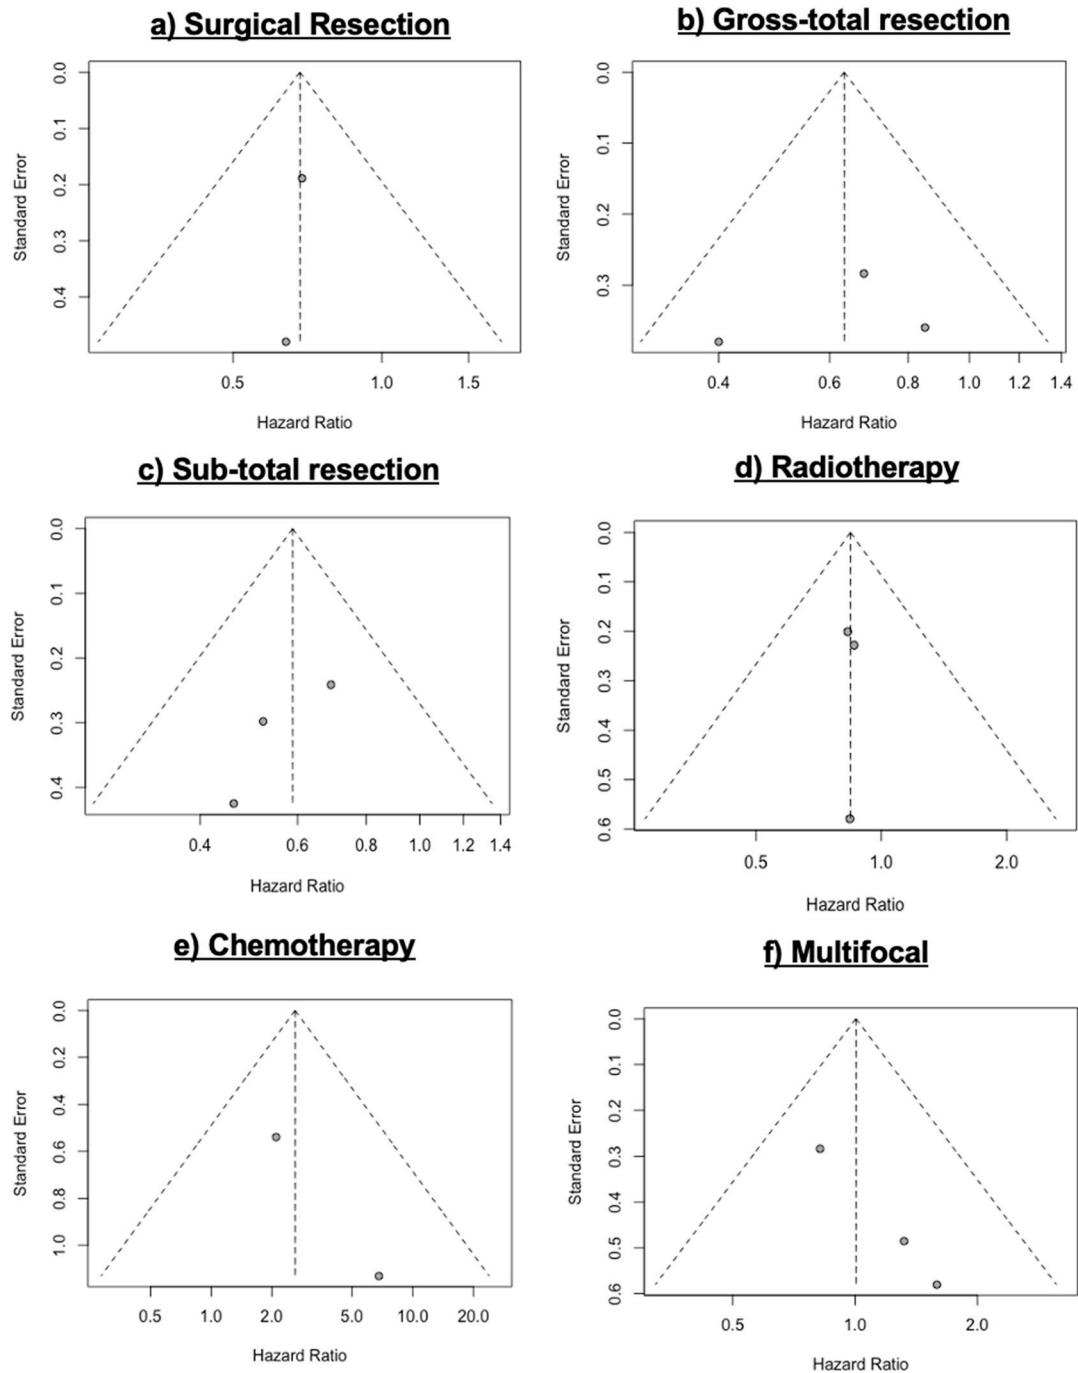

**Figure S2. Funnel plot-hazard ratio (HR)** The distribution of HR and standard error of all included studies demonstrating level of precision among studies in investigating effectiveness of surgical resection, radiotherapy, chemotherapy and multifocal presentation for the treatment of brainstem gliomas.
